# Supplementary material for: Sex differentiation in Atlantic cod (Gadus morhua L.): morphological and gene expression studies
Source: PubMed Central journal article supplement (PMC3433390; doi:10.1186/1477-7827-10-47), 2012-06-18

**NJ**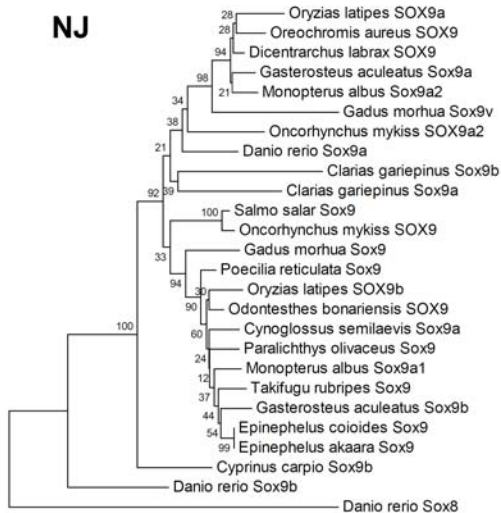**ML**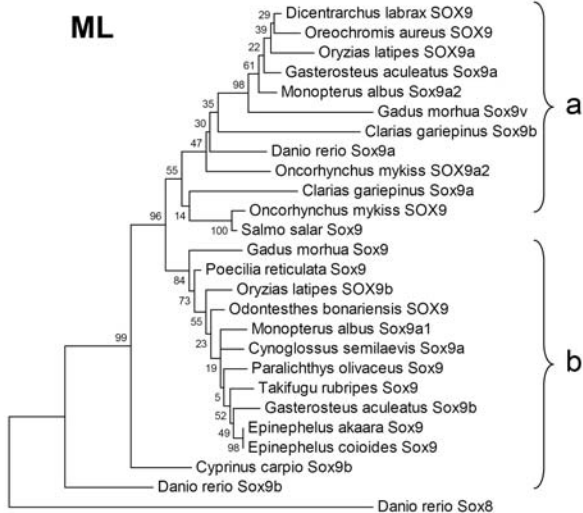

Supplement: 1477-7827-10-47-S3.pdf [file 1477-7827-10-47-S3.pdf]
